# Supplementary material
Source: PubMed Central journal article supplement (PMC3434480)
Supplement: MCB.00083-12_zmb999109551so1.pdf [file MCB.00083-12_zmb999109551so1.pdf]

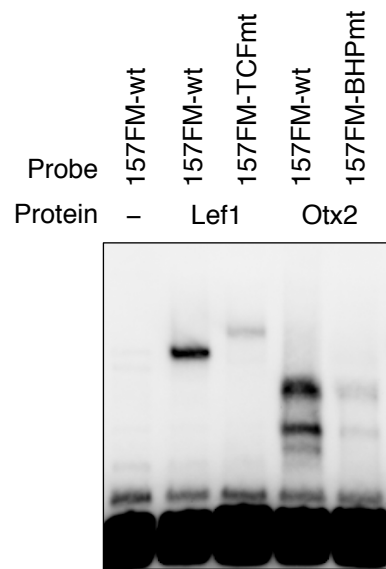

**Fig. S1**

EMSA of Lef1 and Otx2 binding to 157FM. *In vitro* synthesized Lef1 and Otx2 bind to 157FM-wt but not to 157FM-TCFmt and 157FM-BHPmt, respectively.

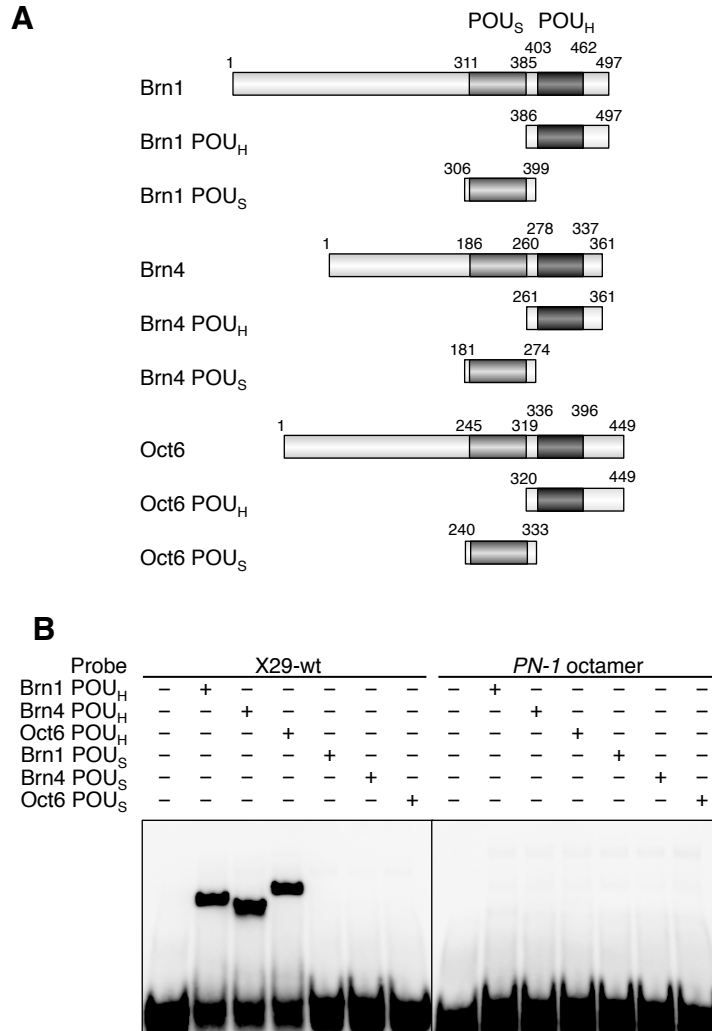

**Fig. S2**

EMSA of Brn1, Brn4 and Oct6 binding to X29. (A) Deletion constructs used in EMSA. (B) EMSA indicated that each POU<sub>H</sub> of Brn1, Brn4 and Oct6, but not POU<sub>S</sub>, associates with X29-wt probe (left panel). Neither POU<sub>H</sub> nor POU<sub>S</sub> associates with *PN-1* octamer probe (right panel).

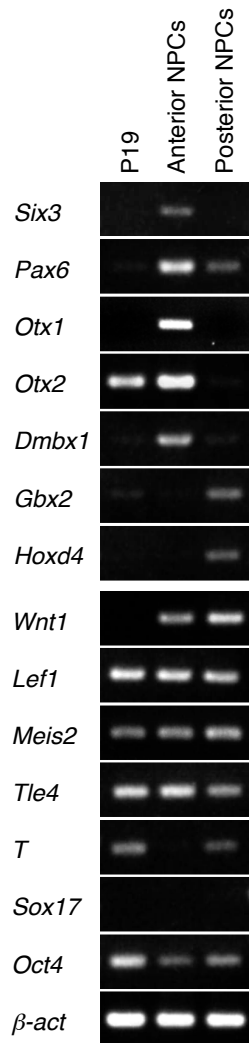

**Fig. S3**

RT-PCR analysis of marker expression in anterior and posterior NPCs differentiated from P19 cells. Forebrain markers (*Six3*, *Otx1*, *Otx2*) and midbrain markers (*Otx1*, *Otx2*, *Dmbx1*) are expressed in anterior NPCs, but not in posterior NPCs; *Pax6* is expressed abundantly in forebrain and midbrain but less in spinal cord; this is also the case in anterior and posterior NPCs. In contrast, hindbrain and spinal cord markers (*Gbx2*, *Hoxd4*) are expressed only in posterior NPCs. *Wnt1*, *Lef1*, *Meis2* and *Tle4* are expressed in both anterior and posterior NPCs. Mesoderm marker (*T*), endoderm marker (*Sox17*), and pluripotent marker (*Oct4*) are less efficiently expressed in these cells. *β-act* expression is given as an internal control.

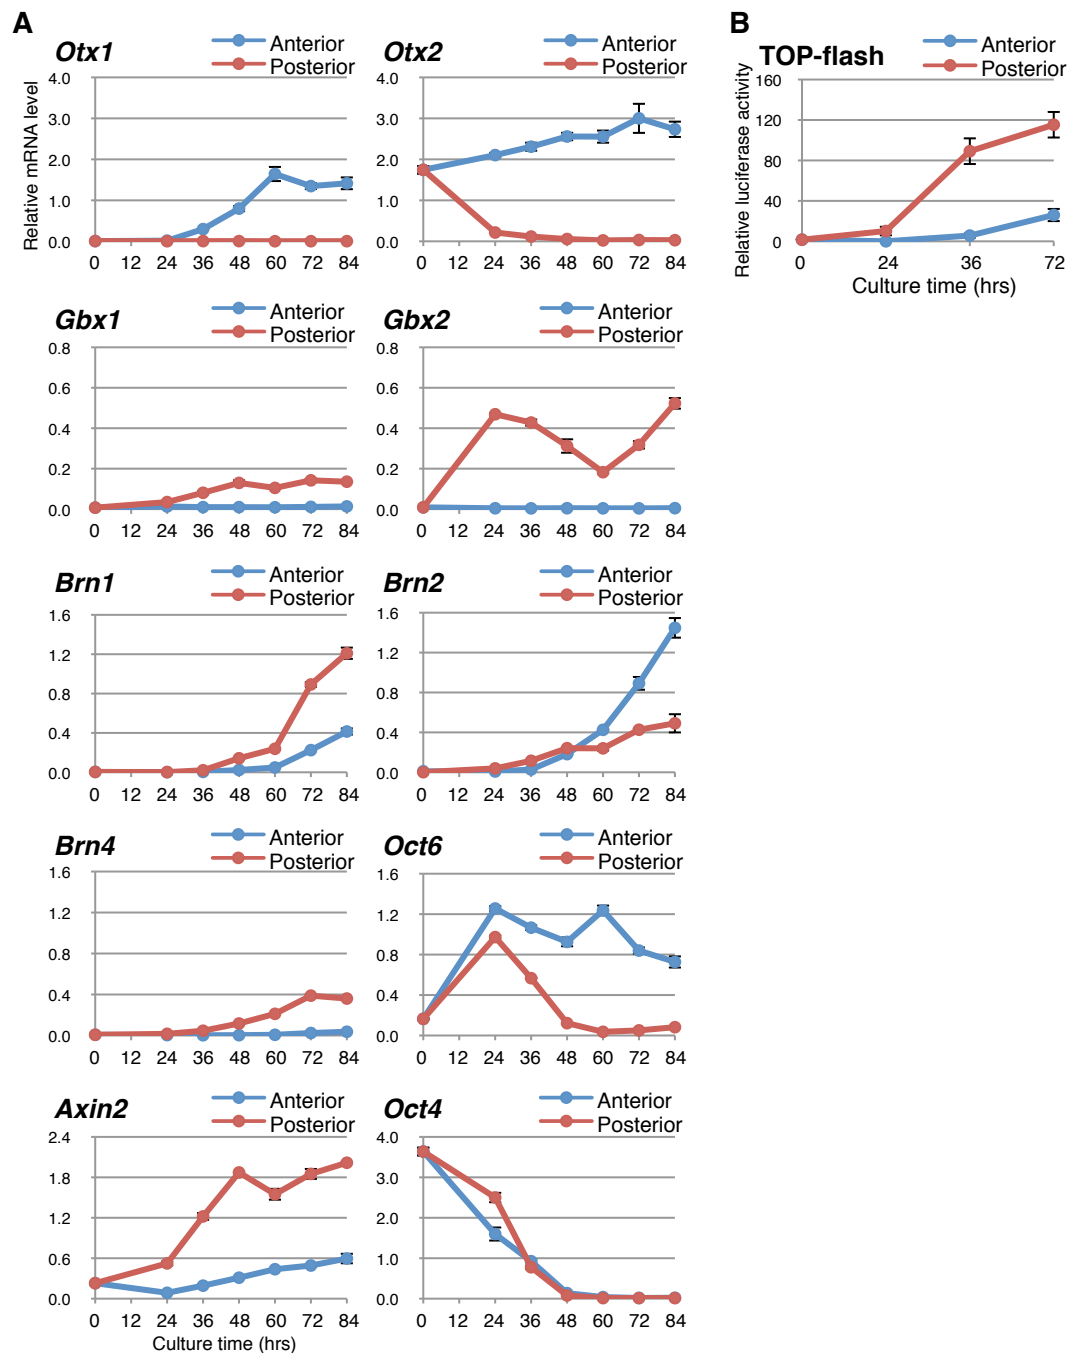

**Fig. S4**

Temporal changes of *Otx1*, *Otx2*, *Gbx1*, *Gbx2*, *Brn1*, *Brn2*, *Brn4*, *Oct6*, *Axin2* and *Oct4* expression and of Wnt signaling with the P19 differentiation into anterior (blue) and posterior NPCs (red). (A) RT-qPCR assay of mRNA levels in the cells cultured in the induction medium for indicated hours; the levels at 0 hr give the expression in undifferentiated P19 cells. The levels are given as the ratio to the *Tbp* expression. *Otx1* and *Otx2* were expressed in anterior NPCs, while *Gbx1* and *Gbx2* in posterior NPCs. In the anterior NPCs (at 84 hrs), *Brn2* and *Oct6* expression was higher, while *Brn1* and *Brn4* expression was lower. In posterior NPCs (at 84 hrs), *Brn1* expression was higher, while *Brn2* and *Brn4* expression was moderate; *Oct6* was transiently expressed at 24–36 hours post induction. A Wnt signal marker, *Axin2*, expression was higher in posterior NPCs, and moderate in anterior NPCs. Pluripotent marker *Oct4* was scarcely expressed in either anterior or posterior NPCs at 48 hours post induction. (B) TOP-flash activity was higher in posterior NPCs, and moderate in anterior NPCs.

**A**

**Brn2**

1 ATG GCG ACC GCA GCG TCT AAC CAC TAC AGC CTG CTC ACC TCC AGC GCC TCC ATC GTA CAT 60

61 GCC GAG CCG CCT GGC GGC ATG CAG CAG GGC GCA GGG GGC TAC CGC GAG GCG CAG AGC CTG 120

121 GTG CAG GGC GAC TAC GGC GCG CTG CAG AGC AAC GGG CAC CCG CTC AGC CAC GCT CAC CAG 180

181 TGG ATC ACC GCG CTG TCC CAC GGC GGC GGC GGC GGG GGC GGC GGC GGC GGT GGA GGA GGC 240

241 GGG GGA GGC GGC GGG GGA GGC GGC GAC GGC TCC CCG TGG TCC ACC AGC CCC CTA GGC CAG 300

301 CCG GAC ATC AAG CCC TCG GTG GTG GTA CAG CAG GGT GGC CGA GGC GAC GAG CTG CAC GGG 360

361 CCA GGA GCG CTG CAG CAA CAG CAT CAA CAG CAA CAG CAA CAG CAG CAG CAG CAG CAG CAG 420

421 CAG CAG CAG CAG CAA CAG CAG CAG CAA CAA CAG CGA CCG CCA CAT CTG GTG CAC CAC GCT 480

481 GCC AAC CAC CAT CCC GGG CCC GGG GCA TGG CGG AGT GCG GCG GCT GCA GCT CAC CTC CCT 540

541 CCC TCC ATG GGA GCT TCC AAC GGC GGT TTG CTC TAT TCG CAG CCG AGC TTC ACG GTG AAC 600

601 GGC ATG CTG GGC GCA GGA GGG CAG CCG GCT GGG CTG CAC CAC CAC GGC CTG AGG GAC GCC 660

661 CAC GAT GAG CCA CAC CAT GCA GAC CAC CAC CCG CAT CCG CAC TCT CAC CCA CAC CAG CAA 720

721 CCG CCC CCG CCA CCT CCC CCA CAA GGC CCA CCG GGC CAC CCA GGC GCG CAC CAC GAC CCG 780

**POUs domain**

781 CAC TCG GAC GAG GAC ACG CCG ACC TCA GAC GAC CTG GAG CAG TTC GCC AAG CAA TTC AAG 840

841 CAG AGG CGG ATC AAA CTC GGA TTT ACT CAA GCA GAC GTG GGG CTG GCG CTT GGC ACC CTG 900

901 TAC GGC AAC GTG TTC TCG CAG ACC ACC ATC TGC AGG TTT GAG GCC CTG CAG CTG AGC TTC 960

961 AAG AAC ATG TGC AAG CTG AAG CCT TTG TTG AAC AAG TGG TTG GAA GAG GCA GAC TCA TCC 1020

**POUh domain**

1021 TCG GGC AGC CCC ACC AGC ATA GAC AAG ATC GCA GCG CAA GGG CGC AAA CGG AAA AAG CGG 1080

1081 ACC TCC ATC GAG GTG AGC GTC AAG GGG GCT CTG GAG AGC CAT TTC CTC AAA TGC CCT AAG 1140

1141 CCC TCG GCC CAG GAG ATC ACC TCC CTC GCG GAC AGC TTA CAG CTG GAG AAG GAG GTG GTG 1200

1201 AGA GTT TGG TTT TGT AAC AGG AGA CAG AAA GAG AAA AGG ATG ACC CCT CCC GGA GGG ACT 1260

1261 CTG CCG GGC GCC GAG GAT GTG TAT GGG GGT AGT AGG GAC ACG CCA CCA CAC CAC GGG GTG 1320

1321 CAG ACG CCC GTC CAG TGA 1338

**Fig. S5-1**

*Brn2* (A), *Oct6* (B), and *Gbx2* (C) coding sequences, and locations of miRNA target sequences and silent mutations. Red bars indicate miRNA target sequences, and blue letters silent mutations in *Brn2sm* and *Oct6sm*.

**B****Oct6**

1 ATG GCC ACC ACC GCG CAG TAT CTG CCG CGG GGC CCC GGC GGC GGA GCT GGG GGC ACA GGG 60  
 61 CCG CTC ATG CAT CCC GAT GCC GCC GCG GCG GCG GCA GCG GCG GCC GAG CGG CTG CAC GCG 120  
 121 GGG GCC GCG TAC CGC GAA GTG CAG AAG CTG ATG CAC CAC GAG TGG CTG GGC GCG GGC GCG 180  
 181 GGC CAC CCC GTG GGC CTA GCG CAC CCT CAA TGG CTA CCC ACG GGA GGA GGC GGC GGC GGC 240  
 241 GAC TGG GCG GGC GGC CCG CAC CTG GAA CAC GGC AAG GCA GGC GGT GGC GGT ACC GGC CGA 300  
 301 GCT GAC GAC GGC GGC GGT GGC GGC GGT TTC CAC GCC CGC CTG GTG CAC CAA GGG GCG GCC 360  
 361 CAC GCG GGC GCG GCA TGG GCA CAA GGC GGC ACA GCG CAC CAC TTG GGC CCC GCC ATG TCG 420  
 421 CCG TCG CCC GGG GCC GGC GGG GGT CAC CAG CCC CAG CCG CTC GGG CTG TAC GCT CAG GCG 480  
 481 GCC TAC CCC GGT GGC GGC GGC GGC GGC CTG GCC GGG ATG CTG GCG GCG GGA GGC GGC GGC 540  
 541 GCG GGA CCC GGC CTG CAC CAC GCA CTG CAC GAG GAC GGC CAC GAG GCA CAG CTG GAG CCG 600  
 601 TCG CCA CCA CCG CAC CTG GGC GCA CAC GGA CAC GCA CAC GGA CAT GCA CAC GCG GGC GGC 660  
 661 CTG CAC GCG GCG GCG GCG CAC CTG CAC CCG GGC GCG GGC GGT GGT GGC TCG TCG GTG GGC 720  
 721 GAG CAC TCG GAC GAG GAT GCT CCC AGC TCC GAC GAC **POUs domain** CTG GAG CAG TTC GCC AAG CAG TTC 780  
 781 AAG CAA CGA CGC ATC AAG CTG GGC TTC ACC CAG GCC GAC GTG GGA CTG GCG CTG GGC ACC 840  
 841 CTC TAC GGT AAC GTG TTC TCG CAG ACC ACC ATC TGC CGT TTC GAG GCC CTG CAG CTG AGC 900  
 901 TTC AAG AAC ATG TGC AAG CTC AAG CCG CTG CTC AAC AAG TGG CTG GAG GAG ACC GAC TCG 960  
 961 TCC AGC GGC AGC CCC ACC AAC CTG GAC AAG ATC GCG GCG CAG GGC **POUh domain** CGC AAG CGC AAG AAG 1020  
 1021 CGC ACG TCC ATC GAG GTG GGT GTC AAA GGC GCG CTC GAG AGC CAC TTT CTC AAG TGT CCC 1080  
 1081 AAG CCG TCT GCG CAC GAG ATC ACC GGC CTG GCC GAC AGC CTG CAA CTG GAG AAG GAG GTG<sup>c</sup> 1140  
 1141 GTG CGT GTC TGG TTC TGC AAC CGG CGG CAG AAG GAG AAG CGC ATG ACC CCC GCG GCC GGC 1200  
 1201 GCG GGC CAC CCG CCC ATG GAC GAC GTT TAT GCG CCT GGG GAG CTG GGG CCT GGC GGG GGG 1260  
 1261 CAG CGC GTC GCC ACC TTC TGC GCC CCC GCC ACC CCC GCC GGC CGC GCT GCA CCA CCA CCA 1320  
 1321 CCA CCA CAC ACT GCC CGG CTC TGT GCA GTG ACC CTG CGG ACT GGG TTC CCC GCC GGC GCA 1380  
 1381 GCG GTG CCT CCG GCG CGC AGT TAG 1404

**Fig. S5-2**

**C****Gbx2**

1 ATG AGC GCA GCG TTC CCG CCG TCG CTG ATG ATG ATG CAG CGC CCG CTG GGG AGT AGT ACC 60  
 61 GCC TTC AGC ATA GAC TCG CTG ATC GGC AGC CCG CCG CAG CCC AGT CCC GGC CAT TTC GTC 120  
 121 TAC ACC GGC TAC CCC ATG TTC ATG CCC TAC CGG CCG GTG GTG CTG CCG CCA CCG CCG CCA 180  
 181 CCG CCT CCC GCG CTG CCC CAG GCA GCG CTG CAG CCC GCT CTG CCG CCC GCG CAC CCT CAC 240  
 241 CAC CAG ATC CCC AGC CTG CCC ACC GGC TTC TGC TCC AGC CTG GCG CAG GGC ATG GCG CTC 300  
 301 ACC TCC ACG CTC ATG GCC ACT CTG CCC GGC GGC TTC TCT GCG TCG CCC CAG CAC CAA GAG 360  
 361 GCG GCG GCT GCC CGC AAG TTC GCT CCA CAG CCA CTG CCC GGA GGC GGC AAC TTC GAC AAA 420  
 421 GCC GAG GCG CTC CAA GCG GAT GCG GAA GAC GGC AAA GCC TTC TTG GCC AAG GAG GGC TCG 480  
 481 CTG CTC GCT TTC TCT GCG GCC GAA GCG GTG CAG GCG TCG CTC GTC GGG GCT GTC CGA GGG 540  
 541 CAA GGG AAA GAC GAG TCA AAG GTG GAA GAT GAC CCG AAG GGC AAG GAG GAG AGC TTC TCT 600  
 601 CTG GAG AGC GAT GTG GAT TAC AGC TCA GAT GAC AAT TTG CCT GGT CAG ACT GCT CAT AAG 660  
 661 GAA GAA GAC CCC GGC CAC GCA CTG GAG GAG ACC CCG CAG AGC GGC GGT GCA GCA GGC AGC 720  
 721 ACC ACG TCC ACA GGC AAG **Homeodomain**  
 781 GAG CTG GAG AAA GAA TTC CAC TGC AAA AAG TAC CTC TCC CTG ACC GAG CGC TCA CAG ATC 840  
 841 GCC CAC GCC CTC AAA CTC AGC GAG GTG CAA GTA AAA ATC TGG TTC CAG AAC CGC CGG GCC 900  
 901 AAG TGG AAA CGT GTC AAG **#1** GCA GGC AAC GCC AAT TCC AAG ACG GGG GAG CCC TCT CGG AAC 960  
 961 CCC AAG AAT GTC GTC CCC ATC CCT GTT CAC GTT AGC AGG TTC GCT ATT CGA AGT CAA CAC 1020  
 1021 CAG CAG CTG GAG CAG GCC CGA CCC TGA **#2** 1047

**Fig. S5-3**

**Table S1**

Mass spectrometric analysis of proteins interacting with 157FM

| <b>Protein</b> | <b>No. of peptides</b> | <b>Coverage</b> |
|----------------|------------------------|-----------------|
| Brn1           | 6                      | 16%             |
| Brn2           | 7                      | 17%             |
| Brn4           | 7                      | 20%             |
| Oct6           | 5                      | 7%              |



**Table S2**

Primers used for plasmid construction. Underlines indicate target sites for restriction enzymes shown in right column.

| <b>Primer</b>                       | <b>Sequence (5'-3')</b>               | <b>Underline</b> |
|-------------------------------------|---------------------------------------|------------------|
| <i>Brn1</i> forward                 | ATGGCCACGGCGGCTTCTAACCC               |                  |
| <i>Brn1</i> reverse                 | CCCGGCATTCACTGCACGC                   |                  |
| <i>Brn2</i> forward                 | CGGCTCCGAGAGTCATGGC                   |                  |
| <i>Brn2</i> reverse                 | GCTTGAGTTCACTGGACGG                   |                  |
| <i>Brn4</i> forward                 | GAGGATCCTCATCGACCATG                  |                  |
| <i>Brn4</i> reverse                 | CTCCTTGCTTCCTCCAGTCA                  |                  |
| <i>Oct6</i> forward                 | ATGGCCACCACCGCGCAGTATC                |                  |
| <i>Oct6</i> reverse                 | TCACTGCACAGAGCCGGGCGAGT               |                  |
| <i>Brn1 POU<sub>H</sub></i> forward | GCTGGAATTCACCATGTCGAGCACTGGCAGTCCCAC  | <i>EcoRI</i>     |
| <i>Brn1 POU<sub>H</sub></i> reverse | GCCTCTTCGCTATTACGCCA                  |                  |
| <i>Brn1 POU<sub>S</sub></i> forward | AGGGGAATTCACCATGGACCCCTCACTCGGACGAG   | <i>EcoRI</i>     |
| <i>Brn1 POU<sub>S</sub></i> reverse | GCTTTCTAGACTACGCTGCGATCTTGTCATATGC    | <i>XbaI</i>      |
| <i>Brn2 POU<sub>H</sub></i> forward | GAAGGTACCATGTCATCCTCGGGCAGCCCCA       | <i>KpnI</i>      |
| <i>Brn2 POU<sub>H</sub></i> reverse | GCCTCTTCGCTATTACGCCA                  |                  |
| <i>Brn2 POU<sub>S</sub></i> forward | GGCGGTACCATGGACCCGCACTCGGACGAG        | <i>KpnI</i>      |
| <i>Brn2 POU<sub>S</sub></i> reverse | GTTTTGCCTCGAGTCACGCTGCGATCTTGTCATATGC | <i>XhoI</i>      |
| <i>Brn4 POU<sub>H</sub></i> forward | GGAGGGTACCATGTCATCCACAGGAAGCCCGAC     | <i>KpnI</i>      |
| <i>Brn4 POU<sub>H</sub></i> reverse | GCCTCTTCGCTATTACGCCA                  |                  |
| <i>Brn4 POU<sub>S</sub></i> forward | CTCGGGTACCATGCAGGACCACTCTGATGAAGAG    | <i>KpnI</i>      |
| <i>Brn4 POU<sub>S</sub></i> reverse | GCGTTTCTCGAGCTAAGCAGCGATCTTGTCATATGC  | <i>XhoI</i>      |
| <i>Oct6 POU<sub>H</sub></i> forward | GGAGGGTACCATGTCGTCAGCGGCAGCCCCA       | <i>KpnI</i>      |
| <i>Oct6 POU<sub>H</sub></i> reverse | GCCTCTTCGCTATTACGCCA                  |                  |
| <i>Oct6 POU<sub>S</sub></i> forward | TGGCGGTACCATGGGCGAGCACTCGGACGAG       | <i>KpnI</i>      |
| <i>Oct6 POU<sub>S</sub></i> reverse | GCGCTTCTCGAGCTACGCCGCGATCTTGTCAG      | <i>XhoI</i>      |

**Table S3**

Primers used for RT-PCR analysis

| <b>Primer</b>        | <b>Sequence (5'-3')</b> |
|----------------------|-------------------------|
| <i>β-act</i> forward | ATTACTGCTCTGGCTCCTAG    |
| <i>β-act</i> reverse | ACGCAGCTCAGTAACAGTCC    |
| <i>Dmbx1</i> forward | TGTACCAATCTTCC TGAGGC   |
| <i>Dmbx1</i> reverse | GACAGGCTCAGTTGAAGTTC    |
| <i>Gbx2</i> forward  | GGAGCTGGAGAAAGAATTCC    |
| <i>Gbx2</i> reverse  | GAACCTGCTAACGTGAACAG    |
| <i>Hoxd4</i> forward | GCCAGATCAAGATCTGGTTC    |
| <i>Hoxd4</i> reverse | TGGAGTGCAAGAAGGGATAG    |
| <i>Lef1</i> forward  | ACACA ACTGGCATCCCTCATC  |
| <i>Lef1</i> reverse  | TTCTGCC CAGGATCTGGTTG   |
| <i>Meis2</i> forward | GCATGGATGGGCAGTGGCAC    |
| <i>Meis2</i> reverse | GGGTCCATGTCTTAACTGAG    |
| <i>Oct4</i> forward  | CCAATGCCGTGAAGTTGGAG    |
| <i>Oct4</i> reverse  | TCTTAAGGCTGAGCTGCAAG    |
| <i>Otx1</i> forward  | TGGGCTCGCCTTCAATTCTG    |
| <i>Otx1</i> reverse  | TGGAGGGTATAGGTAGTTGC    |
| <i>Otx2</i> forward  | CTGTTACCAGCCATCTCAATC   |
| <i>Otx2</i> reverse  | ATAGCTTCTACAGGTCTTCAC   |
| <i>Pax6</i> forward  | AGTGAATGGGCGGAGTTATG    |
| <i>Pax6</i> reverse  | ACTGTAATCGAGGCCAGTAC    |
| <i>Six3</i> forward  | AACTCCTCATCAGAGGGTTG    |
| <i>Six3</i> reverse  | CACAGCTTCACAATCCACTC    |
| <i>Sox17</i> forward | TGTGTATAAGCCCGAGATGG    |
| <i>Sox17</i> reverse | AGGATTTCTTAGCGCTTCC     |
| <i>T</i> forward     | GGTTCTCCGATGTATGAAGG    |
| <i>T</i> reverse     | TGCCACTTTGAGCCTAGAAG    |
| <i>Tle4</i> forward  | CAGTTGCATCTTCATGAGAGC   |
| <i>Tle4</i> reverse  | TAAACCGTAGCTTTCTTGTC    |
| <i>Wnt1</i> forward  | GTTCTGCACGAGTGTCTATG    |
| <i>Wnt1</i> reverse  | TCAGGATGGCAAAGGGTTC     |

**Table S4**

Primers used for quantitative RT-PCR analysis

| <b>Primer</b>        | <b>Sequence (5'-3')</b>    |
|----------------------|----------------------------|
| <i>Axin2</i> forward | TGGGACGACGAGACAGTGC        |
| <i>Axin2</i> reverse | GATCCTCTCCACTTTGCCAG       |
| <i>Brn1</i> forward  | TGTGGAAAGACAGCACCAACC      |
| <i>Brn1</i> reverse  | TCAAAGTTGGCAACGCATTG       |
| <i>Brn2</i> forward  | ATGGGGGTAGTAGGGACACG       |
| <i>Brn2</i> reverse  | CCGCTTGAGTTCAC TGGACG      |
| <i>Brn4</i> forward  | CTTCAGCTTCGTGCGGAGAG       |
| <i>Brn4</i> reverse  | GCTGGACCAGAATCTTCGTGAC     |
| <i>Gbx1</i> forward  | ACGTCAACAGGTTTGCTGTG       |
| <i>Gbx1</i> reverse  | GGCCAAATAGTCTTGTGTCC       |
| <i>Gbx2</i> forward  | ACCATGGAGAGGCCCTAACAC      |
| <i>Gbx2</i> reverse  | TTCTGCTTTAAACAGTGGAGTCTGAC |
| <i>Oct4</i> forward  | GAACCTGGCTAAGCTTCCAAG      |
| <i>Oct4</i> reverse  | CCAATACCTCTGAGCCTGGTC      |
| <i>Oct6</i> forward  | TTTGTATGCCCGACTAAACCG      |
| <i>Oct6</i> reverse  | GATGGGT CAGAAATTAGGAAACCA  |
| <i>Otx1</i> forward  | CCCGACTGTCTGGACTATAAGGAC   |
| <i>Otx1</i> reverse  | TCCTGGGCTCACAAGACCTG       |
| <i>Otx2</i> forward  | CAATGTCCCAGGCTCATCA        |
| <i>Otx2</i> reverse  | TCAGTGCCAAC TACCTGTTGGT    |
| <i>Tbp</i> forward   | GTGATGTGAAGTTCCCTATAAGG    |
| <i>Tbp</i> reverse   | CTACTGAAC T GCTGGTGGGTCA   |

**Table S5**

Oligonucleotides used to construct miRNA expression plasmids

| Primer                   | Sequence (5'-3')                |
|--------------------------|---------------------------------|
| <i>miR-Brn2</i> top      | TGCTGAGTAAATCCGAGTTTGATCCGGTTT  |
|                          | TGGCCACTGACTGACCGGATCAATCGGATT  |
|                          | TACT                            |
| <i>miR-Brn2</i> bottom   | CCTGAGTAAATCCGATTGATCCGGTCAGTC  |
|                          | AGTGGCCAAAACCGGATCAAACCTCGGATTT |
|                          | ACTC                            |
| <i>miR-Oct6</i> top      | TGCTGTGCAGAACCAGACACGCACCAGTTT  |
|                          | TGGCCACTGACTGACTGGTGCGTCTGGTTC  |
|                          | TGCA                            |
| <i>miR-Oct6</i> bottom   | CCTGTGCAGAACCAGACGCACCAGTCAGTC  |
|                          | AGTGGCCAAAACCTGGTGCGTGTCTGGTTCT |
|                          | GCAC                            |
| <i>miR-Gbx2#1</i> top    | TGCTGTTTACTTGCACCTCGCTGAGTGTTT  |
|                          | TGGCCACTGACTGACACTCAGCGGTGCAAG  |
|                          | TAAA                            |
| <i>miR-Gbx2#1</i> bottom | CCTGTTTACTTGCACCGCTGAGTGTCAGTC  |
|                          | AGTGGCCAAAACACTCAGCGAGGTGCAAGT  |
|                          | AAAC                            |
| <i>miR-Gbx2#2</i> top    | TGCTGTAGCGAACCTGCTAACGTGAAGTTT  |
|                          | TGGCCACTGACTGACTTCACGTTTCAGGTTC |
|                          | GCTA                            |
| <i>miR-Gbx2#2</i> bottom | CCTGTAGCGAACCTGAACGTGAAGTCAGTC  |
|                          | AGTGGCCAAAACCTTCACGTTAGCAGGTTTC |
|                          | CTAC                            |
